# Supplementary material for: Identification of PBX1 Target Genes in Cancer Cells by Global Mapping of PBX1 Binding Sites
Source: PubMed Central journal article supplement (PMC3342315; doi:10.1371/journal.pone.0036054), 2012-05-02

Fig. S6

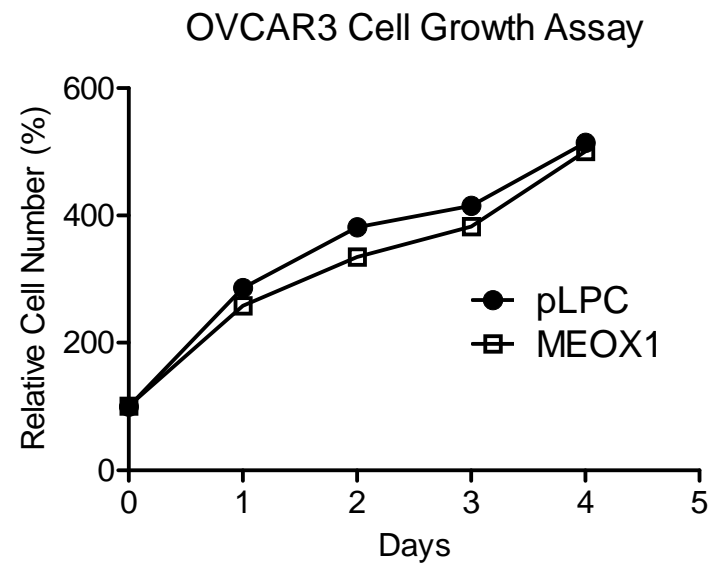

Supplement: pone.0036054.s006.pdf [file pone.0036054.s006.pdf]
