# Supplementary material for: Identification of PBX1 Target Genes in Cancer Cells by Global Mapping of PBX1 Binding Sites
Source: PLoS One. 2012 May 2;7(5):e36054. doi: 10.1371/journal.pone.0036054 (PMC3342315; doi:10.1371/journal.pone.0036054)
Supplement: Table S3 — Canonical transcription factor motifs enriched in PBX1 ChIPed sequences. (XLSX) [file pone.0036054.s009.xlsx]

## Sheet: Sheet1
Table S3. Canonical Transcription Factor Motif Enriched in Pbx1 ChIP-chip Binding Sequences
TRANSFAC	Factors	Consensus Seq	Hits	Z score	-10*LOG(pval)
M00209_observed	NFYA,NFYB,NFYC	5CCAA2A2	1643	-4.4667	3.9723e-06
M00128_observed	GATA-1,GATA1	5TATCW3	2125	-4.1617	1.5796e-05
M01267_observed	FOSL1,Fosl1	MTGAMWCA	2063	-3.9271	4.298e-05
M01489_observed	NKX6.1,NKX6-1	6TAAT1A5	27	-3.2058	0.00067353
M00623_observed	Crx,CRX	4GATTA4	51	-3.1647	0.0007762
M00789_observed	QRSL1	YYTATCW	2149	-3.093	0.0009906
M01245_observed	MTERF	1CC1A6CC1	252	-2.8314	0.0023174
M00346_observed	GATA-1,GATA1	TKTTATCWKY	2098	-2.797	0.0025793
M01387_observed	OTX2,Otx2	6GATTA6	668	-2.7814	0.002706
M00348_observed	GATA2,Gata2	TSTTATCWYT	2134	-2.7694	0.0028083
M01403_observed	Otx3,CRX,DMBX1	7GATTA5	742	-2.7144	0.0033197
M01013_observed	IPF1,PDX1	5CATTA5	1859	-2.6946	0.0035233
M00419_observed	MEIS1	SHYCTGTCAYWR	570	-2.6857	0.0036188
M01751_observed	EHF	ACCMGGAART	1402	-2.6845	0.0036322
M01484_observed	Pitx1,PITX1	6GGATT6	220	-2.6546	0.0039704
M00080_observed	Evi-1,RUNX1	TTATCTTATCT	585	-2.6526	0.0039939
M01234_observed	IPF1,PDX1	AVMTAATGAS	739	-2.6352	0.0042047
M01017_observed	Pbx-1,PBX1	BWTGATKGATRK	2080	-2.6093	0.0045366
M01272_observed	SOX2	7TTGT2T2	231	-2.5432	0.0054919
M01718_observed	NF-AT2,NFATC1	DWGGAAA	1430	-2.5056	0.0061126
M00436_observed	IPF1,PDX1	KKWYATTARHWY	1946	-2.4312	0.0075236
M01436_observed	Crx,CRX	7GATTA4	255	-2.4302	0.0075459
M00396_observed	En-1,EN1	GTARTKG	709	-2.3869	0.0084953
M01123_observed	NANOG,Nanog	GRRVYCATTKCC	1456	-2.3756	0.0087607
M01235_observed	IPF1,PDX1	MVVTAATTAV	954	-2.3681	0.00894
M00630_observed	FOXM1	ASTSMWKYT	1106	-2.3222	0.010112
M01756_observed	GATA-1,GATA1	TTATCW	1179	-2.3222	0.010112
M00395_observed	HOXA3	CSTAWTDKK	55	-2.322	0.010115
M00241_observed	NKX2-5,Nkx2-5	SWTAATTG	2170	-2.3207	0.01015
M01252_observed	E2F6,E2f6	YBTTTCYT	172	-2.2996	0.010734
M01281_observed	NFAT1,NFATC2	TTTTCC	66	-2.2588	0.011947
M01239_observed	RELB,NFKB2	RRAAWBYCCC	717	-2.2344	0.012729
M00126_observed	GATA-1,GATA1	4WGATA5	719	-2.1695	0.015022
M01185_observed	BCL6	A7AAAG2	52	-2.1561	0.01554
M01131_observed	SOX10	BACAAWG	1432	-2.1512	0.015728
M00065_observed	TCF3	5CAG1TG5	767	-2.1483	0.015845
M01422_observed	lhx6.1,LHX6	6TRAT1A5	324	-2.14	0.016178
M00924_observed	AP-1,FOS,FOSB,JUN,JUNB,JUND	VMSHDTRAGTCA	707	-2.1378	0.016266
M00810_observed	SRF	2CA1A3GG7	368	-2.1153	0.017202
M01590_observed	SMAD1,Smad1	KYYTTTSTYYTK	278	-2.1054	0.017628
M01275_observed	IPF1,PDX1	YTAATG	189	-2.0457	0.020392
M00152_observed	SRF	5C3T2GG2A1	571	-2.0265	0.021356
M00432_observed	NKX2-1,Nkx2-1	WSWSAAGTRK	2151	-2.0161	0.021895
M00925_observed	JUNB	HTRAGTCAY	1004	-1.9863	0.023501
M00935_observed	NF-AT	GWGGAAAMWY	2078	-1.9755	0.024106
M01402_observed	HoxA2,HOXA2	4T1ATTA6	1445	-1.9717	0.024325
M00105_observed	CUX1,Cux1	1A8TAT1G	571	-1.9524	0.025447
M00109_observed	CEBPB,Cebpb	3TT1C2MA3	167	-1.9412	0.026119
M01426_observed	HOXB9	6AT1AAA4	448	-1.9257	0.027069
M00821_observed	GABPA,Gabpa	6WKTCA2	351	-1.9234	0.027212
M01476_observed	POU2F3	4ATG3AT4	1020	-1.9193	0.027472
M00199_observed	AP-1,FOS,FOSB,JUN,JUNB,JUND	CTGASTCAY	1545	-1.9137	0.027828
M00926_observed	AP-1,FOS,FOSB,JUN,JUNB,JUND	TRAGTCAB	1595	-1.8973	0.028894
M01338_observed	HOXD3	5AATTA6	28	-1.8955	0.029015
M00216_observed	TATA	HCYWTAAAAR	512	-1.8921	0.02924
M00687_observed	NFYA,Nfya	MARCCAATSAG	1667	-1.8748	0.030407
M01346_observed	TGIF1	6CTG1CA5	700	-1.8729	0.030545
M01392_observed	HOXA6	4TAATT7	109	-1.8651	0.031087
M00137_observed	Oct-1,POU2F1	4TAAT1A3	2168	-1.7975	0.036125
M01202_observed	VDR	1GGT6GT3	138	-1.7781	0.037692
M00655_observed	PEA3,ETV4	MGGAWGT	1328	-1.7662	0.038684
M00805_observed	LEF1	WCAAAG	1299	-1.7604	0.039172
M00773_observed	MYB	RSDKBCAGTTR	2048	-1.7543	0.03969
M01356_observed	PMX2B,PHOX2B	5TAATT7	40	-1.7439	0.040585
M01482_observed	NKX3-2,Nkx3-2	7ACTTA5	1681	-1.7337	0.041484
M01319_observed	HoxB5,HOXB5	4T1ATTA6	721	-1.7182	0.042884
M00156_observed	RORA	7GGTCA1	1898	-1.7181	0.042893
M01452_observed	HOXA5	4T1ATTA6	227	-1.7178	0.042914
M00350_observed	GATA-3,GATA3	TMTTATCTYT	1034	-1.7162	0.043067
M00074_observed	Ets1	4MGGAW4	263	-1.6822	0.046268
M01412_observed	Msx-1,MSX1	7AATTA4	26	-1.6597	0.048485
